1 **Differential expression of PKC $\alpha$  and - $\beta$  in the zebrafish retina**

2

3

4 Marion F. Haug<sup>1</sup>, Manuela Berger<sup>1</sup>, Matthias Gesemann<sup>1</sup>, Stephan C. F. Neuhaus<sup>1†</sup>

5

6 <sup>1</sup>University of Zurich, Institute of Molecular Life Sciences, Neuroscience Center Zurich,

7 Winterthurerstrasse 190, CH-8057 Zurich, Switzerland

8

9

10 † Corresponding author

11 E-mail: [stephan.neuhaus@imls.uzh.ch](mailto:stephan.neuhaus@imls.uzh.ch)

12

13

14

15

16

## 17 **Abstract**

18 The retina is a complex neural circuit in which visual information is transmitted and processed  
19 from light perceiving photoreceptors to projecting retinal ganglion cells. Much of the  
20 computational power of the retina rests on signal integrating interneurons, such as bipolar cells  
21 in the outer retina. While mammals possess about 10 different bipolar cell types, zebrafish  
22 (*Danio rerio*) has at least six ON-type, seven OFF-type, and four mixed-input bipolar cells.

23 Commercially available antibodies against bovine and human conventional protein kinase C  
24 (PKC)  $\alpha$  and  $-\beta$  are frequently used as markers for retinal ON-bipolar cells in different species,  
25 despite the fact that it is not known which bipolar cell subtype(s) they actually label.

26 Moreover, the expression pattern of the five *prkc* genes (coding for PKC proteins) has not been  
27 systematically determined. While *prkcg* is not expressed in retinal tissue, the other  
28 four *prkc* (*prkcaa*, *prkcab*, *prkcba*, *prkcbb*) transcripts were found in different parts of the  
29 inner nuclear layer and some as well in the retinal ganglion cell layer.

30 Immunohistochemical analysis in adult zebrafish retina using PKC $\alpha$  and PKC $\beta$  antibodies  
31 showed an overlapping immunolabeling of ON-bipolar cells that are most likely of the B<sub>ON</sub> s6L  
32 or RRod type and of the B<sub>ON</sub> s6 type. However, comparison of transcript expression with  
33 immunolabing, implies that these antibodies are not specific for one single zebrafish  
34 conventional PKC, but rather detect a combination of PKC  $-\alpha$  and  $-\beta$  variants.

35

36

## 37 **Introduction**

38 Bipolar cells of the vertebrate retina transmit and shape the light signal from photoreceptors to  
39 projecting ganglion cells. Broadly accepted and widely used markers for bipolar cells are  
40 protein kinases  $\alpha$  and  $\beta$  (PKC $\alpha$ , PKC $\beta$ ). First used in the late 1980s [1] they soon became a  
41 popular markers for rod bipolar cells in mammals and the corresponding mixed-type ON-  
42 bipolar cell in teleosts [2–9]. These cells are presumably labelled by PKC $\alpha$  and/or  $\beta$  [10–12].  
43 However, there are other bipolar cell subtypes such as the smaller BON s6 type that are also  
44 labelled by this antibody in zebrafish [12]. It is currently unclear which subset of bipolar cells  
45 are in fact labelled by these antibodies.

46 In the mammalian retina more than ten different subtypes of ON- and OFF-bipolar cells have  
47 been identified (e.g. [13–18]. In non-mammalian vertebrates, the number of different bipolar  
48 cell types may even be higher and can exceed 20 [19–23]. The different subtypes are classified  
49 according to their morphology and their connectivity pattern within one or more sublamina of  
50 the inner plexiform layer (IPL) [19,16,18]. ON-type bipolar cells typically send their axons to  
51 the inner sublamina “b” of the IPL whereas OFF-bipolar cells stratify in the outer sublamina  
52 “a” of this layer [24–26]. Many non-mammalian vertebrates possess a set of mixed-type bipolar  
53 cells that send axons to both IPL sublaminae and functionally show both ON- and OFF-  
54 response properties [27–29]. Although some markers for specific bipolar cell subtypes exist,  
55 inter-species comparison is problematic due to the high variability in bipolar cell subtypes and  
56 differences in connection patterns. In zebrafish 17 morphologically distinct bipolar cell  
57 subtypes have been described [19]. However, recent studies considering both axonal  
58 stratification pattern and photoreceptor connectivity for the classification of bipolar cells,  
59 suggest that the number of different bipolar cell subtypes may even be as high as 33 [20]. Since  
60 PKC antibodies are commonly used to label bipolar cells, the detailed expression profile of  
61 PKCs and the specificity of these antibodies for each PKC variant are of importance.

62 PKC $\alpha$ / $\beta$  belong to the group of conventional PKCs (cPKCs) that consist of the three members  
63 PKC $\alpha$ , - $\beta$  (in two alternatively spliced isoforms I and II), and  $\gamma$  [30]. cPKCs require  
64 diacylglycerol (DAG) along with calcium and a phospholipid such as phosphatidylserine for  
65 activation [31]. They play fundamental roles in numerous signal transduction pathways and  
66 have been linked to a number of neurological diseases [32],, and retinal pathologies such as  
67 diabetic retinopathy [33]. Due to the whole genome duplication event at the base of the teleost  
68 lineage (reviewed in [34], more than one gene paralog for *prkca* and *prkcb* exists in zebrafish  
69 [35]. It is not known whether these zebrafish orthologs are recognized by the commercially  
70 available antibodies and whether there is crossreactivity between the different variants.  
71 Moreover, comparative studies about *prkc* expression in the retina are missing. The aim of this  
72 study is therefore to focus on retinal *prkc* expression and to correlate the *prkc* transcript  
73 expression with the labeling of commercially used PKC $\alpha$  and - $\beta$  antibodies.

74

## 75 **Materials and methods**

### 76 **Fish maintenance and breeding**

77 Adult fish (RRID:ZIRC\_ZL84) were maintained under standard conditions at 26 - 28°C in a  
78 14-hour light/10-hour dark cycle. The wild-type strain WIK was used for all experiments  
79 described here. Embryos were raised at 28°C in E3 medium (5mM NaCl, 0.17mM KCl,  
80 0.33mM CaCl<sub>2</sub>, and 0.33mM MgSO<sub>4</sub>). They were staged according to development in days  
81 post fertilization (dpf) (Kimmel et al., 1995). 12 adult fish were used for the experiments. All  
82 larval and adult fish used in this study were fixed between 9am and 11am. The fish were  
83 euthanized using tricaine (ethyl 3-aminobenzoate methanesulfonate; Sigma-Aldrich, Buchs,  
84 Switzerland) and iced water. All animal experiments were performed in accordance with the  
85 ARVO Statement for the Use of Animals in Ophthalmic and Vision Research and were  
86 approved by the local authorities (Veterinäramt Zürich TV4206).

87

### 88 **(Fluorescent) *in situ* hybridization ((F)ISH)**

89 Primers used for the generation of RNA probes were published earlier this year (Haug,  
90 Gesemann, Berger, & Neuhauss, 2018). The plasmids containing cDNA sequences of the  
91 different *prkcs* were linearized with the appropriate restriction enzymes for T7 and Sp6, and  
92 the DNA was extracted with a standard phenol/chloroform protocol using pre-spinned RNase-  
93 free Phase-Lock tubes (5 Prime, Hamburg, Germany). Linearized DNA was *in vitro* transcribed  
94 and DIG-labeled using a kit (DIG-RNA labeling kit; Roche, Rotkreuz, Switzerland), and  
95 applied on adult zebrafish retinal sections as previously described (Haug, Gesemann, Mueller,  
96 & Nehuauss, 2013) at a concentration of approximately 2 ng/μl. FISH was performed as  
97 described in (Huang, Haug, Gesemann, & Neuhauss, 2012), however, fluorescent labeling was  
98 accomplished using the TSA kit #12 (Molecular Probes, Life Technologies, Zug, Switzerland).  
99 Images were taken by confocal microscopy (CLSM SP5 and TCS LSI, Leica, Heerbrugg,

100 Switzerland), z-stacks that covered a depth of 1 – 2  $\mu\text{m}$  were selected and processed using  
101 ImageJ (Version 1.49, August 2014, Java), and further processed (brightness, contrast and  
102 gamma levels of the whole image) and arranged with Adobe Photoshop (RRID:SCR\_014199)  
103 and Illustrator CS5.

104

### 105 **Immunohistochemistry**

106 Adult zebrafish retinal tissue was prepared similar as described in a previous publication (Haug,  
107 Gesemann, Mueller, & Neuhauss, 2013) but the fixation time was reduced to 40 min to not  
108 overfixate the tissue. Immunohistochemical labeling was performed as previously described  
109 (Fleisch, Schönthaler, Lintig, & Neuhauss, 2008) with the following modifications: Blocking  
110 solution contained 0.3% Triton X-100 (Sigma-Aldrich) instead of Tween 20 and was applied  
111 for 30 min at RT. Different primary anti-PKC $\alpha$  and  $-\beta$  antibodies were used at the following  
112 concentrations: PKC $\alpha$  NBP1-19273, 1:500 (Novus, Abingdon, UK); PKC $\alpha$  MC5, NB 200-568,  
113 1:1000 (Novus); PKC $\alpha$  MC5, 1:1000 (Genetex), PKC $\beta$ 1 C16, SC209, 1:1000 (Santa Cruz  
114 Biotechnology, Heidelberg, Germany). Anti-rabbit and anti-mouse Alexa 488 (1:1000; Roche)  
115 and/or Alexa 568 (1:500; Roche) were used as secondary antibodies. Slides were mounted with  
116 Mowiol-DABCO mounting medium (10% Mowiol 4-88 (Polysciences, Warrington, USA),  
117 25% glycerol, 2.5% DABCO (1,4-diazobicyclo[2.2.2]octane, Sigma-Aldrich) in 100 mM Tris–  
118 HCl pH 8.5) and stored in darkness at 4°C. Images were taken by confocal microscopy (CLSM  
119 SP5 and TCS LSI, Leica, Heerbrugg, Switzerland) and arranged in Fig 1. Images a-a'' and b-  
120 b'' cover a z-stack of 4.6 and 4.8  $\mu\text{m}$ , respectively, images c-c'' measure 1.6  $\mu\text{m}$  in depth, and  
121 images e and f are only composed of one single plane. All images were selected and processed  
122 using ImageJ (Version 1.49, August 2014, Java), and further processed (brightness, contrast  
123 and gamma levels of the whole image) and arranged using Adobe Photoshop  
124 (RRID:SCR\_014199) and Illustrator CS5.

125

## 126 **Expression of recombinant PKCs and Western blot**

127 The coding region of each zebrafish *prkc* was PCR amplified with the primers that are listed  
128 in Table 1, and subcloned into pIRES2:EGFP vector (kindly provided by M. Kamermans).  
129 Expression was done in HEK293T cells. Transient transfection of cells using the  $\text{Ca}_3(\text{PO}_4)_2$   
130 technique was performed as previously described (Kimmel, Ballard, Kimmel, Ullmann, &  
131 Schilling, 1995). 5  $\mu\text{g}$  linearized DNA or only buffer for mock transfection was added to the  
132 cells. 30 to 40 hours post-transfection when the cell layer had reached a confluence of up to  
133 100%, cells were checked for GFP signals. Subsequently, the medium was aspirated and the  
134 plates were placed on ice and washed with three times with 3 ml cold PBS containing 0.9  
135 mM  $\text{CaCl}_2$ . Next, cells were lysed by adding 500  $\mu\text{l}$  Laemmli buffer (4.4 ml 0.5M Tris-HCl  
136 pH 6.8, 4.4 ml Glycerol, 2.2 ml 20% SDS, 0.65 ml 1% Bromophenol blue) supplemented  
137 with Protease inhibitor (Complete Mini, Roche), and collected in a 2 ml Eppendorf tube. Cell  
138 lysates were supplemented with 1:40  $\beta$ -Mercaptoethanol and homogenized with a pestle. After  
139 heating them to 90°C for 5 min, the lysates were cleared using centrifugation, the supernatant  
140 sonicated and subjected to Western blot analysis. Lysates were loaded on a 10% precast gel  
141 (Mini Protean TGX, Biorad, Cressier, Switzerland), blotted to PVDF membranes (0.2  $\mu\text{m}$ ,  
142 Novex, Thermo Fisher Scientific) which were blocked for 2 hours in PBS containing 0.05%  
143 Tween 20 and 3% dry milk powder (PBS-TM) at RT. Primary antibodies were used in the  
144 same concentrations as described for immunohistochemistry and applied ON at 4°C in PBS-  
145 TM. As a loading control anti-Vinculin (124 kDa; 1:5000, Genetex) was used. After a 5 min  
146 washing step in PBS-TM followed by two 10 min washing steps in PBS containing 0.05%  
147 Tween 20 (PBT), the membranes were incubated for 45 min at RT with secondary  
148 horseradish peroxidase (HRP-) linked antibodies (Invitrogen, Thermo Fisher Scientific)  
149 diluted in PBS-TM (goat anti-rabbit, 1:5000; goat anti-mouse, 1:7500). Following a 20 min  
150 washing with PBS-TM and four 5 min washes with PBT, membranes were subjected to  
151 development solution (Super Signal West Dura Extended Duration Substrate, Thermo Fisher

152 Scientific) for 5 min at RT. Finally, the signals were detected by the LAS 4000  
153 Chemiluminescence Imager (software: Image Quant LAS 4000, automatic exposure) and  
154 processed using Adobe Illustrator C5.

155

## 156 **Results**

157 In mammals, the family of conventional *prkcs* consists of the three members *-a*, *-b* and *-g*  
158 (Newton, 2010). Based on sequence similarity, we annotated and cloned five different zebrafish  
159 *prkc* cDNAs, two paralogs of *prkca* and *prkcb* and one single *prkcg* paralog. The phylogeny  
160 and the detailed description of the larval expression pattern of these genes is reported in [35].

161 In this study we describe *prkc* transcript expression in the retina by *in situ* hybridization in  
162 combination with PKC antibody labeling using commercially available antibodies.

163

### 164 **Commercially available PKC $\alpha$ and - $\beta$ antibodies label overlapping subsets of ON-bipolar** 165 **cells**

166 PKC $\alpha$  and - $\beta$  antibodies are used as a marker for retinal ON-bipolar cells in different species  
167 [2,36,12]. As there are no zebrafish specific PKC antibodies available commercial PKC  
168 antibodies are commonly used as bipolar markers. We tested different frequently used PKC  
169 antibodies raised against bovine and human epitopes and found marked differences in their  
170 staining profile of bipolar cells (Fig 1).

171 All used PKC antibodies showed specific labeling in the retinal INL and IPL, presumably in  
172 ON-bipolar cells and their processes (Fig 1A-C). A separate double labeling of each PKC $\alpha$   
173 MC5 with PKC $\beta$  showed that all antibodies label identical cells in the middle part of the INL  
174 (Fig 1A'-'' and B'-''), some with smaller axon terminals (arrows) and some with a larger axon  
175 terminal (arrowheads). In addition, both PKC $\alpha$  MC5 antibodies detect cells in the GCL



176 (asterisk in Fig 1A'',B'',3J). Another PKC $\alpha$  antibody (Novus (NBP)) also weakly labels the  
177 same cells in the INL but showed a very strong labeling in the retinal ONL, presumably in  
178 accessory outer segments (Fig 1C''-''') (Hodel et al., 2014). Aside from the retina, PKC  
179 antibodies additionally label different cells in other tissues. Applying PKC $\alpha$  MC5 (Genetex)  
180 and PKC $\beta$  on transverse sections of the brain and the jaw of 5 days old zebrafish larvae shows  
181 antibody-specific labeling in distinct areas of both examined tissue samples (Fig 1D,E),  
182 demonstrating that these antibodies recognize different zebrafish PKCs with different affinities.  
183 Hence, the labeled ON-bipolar cells might express a mix of different PKCs.

184

### 185 ***prkc* transcripts in the zebrafish retina are expressed in overlapping but distinct patterns**

186 To gain a detailed view of *prkc* expression in the zebrafish retina, we analyzed adult retinal  
187 tissue by *in situ* hybridization (ISH). While both paralogs of the zebrafish *prkca* and *-b* genes  
188 are expressed in the adult zebrafish retina, we never observed expression of *prkcg* (Fig 2a,c,e,g,  
189 ). Therefore, we excluded *prkcg* from further analysis. In contrast to *prkcaa* mRNA that can be  
190 detected in the middle INL (Fig 2a), *prkcab* and the two *prkcb* transcripts are more widely  
191 expressed. *prkcab* is expressed in the middle and the distal INL, as well as in the GCL (Fig 2c).  
192 A strong labeling in the proximal INL and the GCL is seen for *prkcba* (Fig 2e) whereas *prkcbb*  
193 is only weakly expressed throughout the INL and in the GCL (Fig 2g). The expression pattern  
194 we found using the same probe but with a fluorescent tag (FISH) were generally overlapping  
195 (Fig 2 b1,d1,f1,h1). However, for *prkcbb* we found an additional weak expression in the ONL  
196 (arrowhead in Fig 2h1), suggesting a difference in the sensitivity of the two detection methods.

197

### 198 **PKC $\alpha$ MC5 antibody labeling highlights *prkcaa*, *-ab*, and *-bb* expressing cells and the** 199 **corresponding proteins**

200 As the different zebrafish *prkcs* were not expressed in the same retina layers, we combined  
201 *prkc* RNA labeling with antibody staining in adult retinal sections to demonstrate which *prkc*

202 expression overlaps with the PKC antibody labeling. We chose to use PKC $\alpha$  MC5 of Novus as  
203 a marker for this experiment, as it shows an overlapping labeling in bipolar cells with all other  
204 antibodies tested but also labeling in some additional cells in the GCL compared to PKC $\beta$  (Fig  
205 1a’’).

206 Interestingly, all PKC $\alpha$ -positive bipolar cells clearly express *prkcaa* within their cell bodies  
207 and vice versa (Fig 1b3-4), whereas the *prkcab* transcript seems to be located in some but not  
208 all bipolar cells labeled by the PKC $\alpha$  antibody (Fig 1d3-4). For *prkcb* genes we found no  
209 overlap of the antibody labeling with *prkcba* (Fig 1f3-4) and only a partial overlap with *prkcbb*  
210 (Fig 1h3-4).

211 In order to gain insight into PKC antibody specificity in zebrafish we generated expression  
212 constructs of full length *prkc* transcripts, and tested antibody recognition of recombinant  
213 proteins by Western blot (Fig 3). Since both PKC $\alpha$  MC5 antibodies showed comparable results,  
214 only the result with the PKC $\alpha$  MC5 from Genetex is shown. For each antibody a different  
215 pattern can be observed (see overview in Fig 3d). When applying the PKC $\alpha$  NBP antibody on  
216 recombinant zebrafish PKCs, bands in different intensities around the expected size of 75 kDa  
217 can be detected (Fig 3a). The PKC $\alpha$  NBP antibody recognizes a faint band of a lower size for  
218 PKC $\beta$ a (black arrowhead in Fig 3a, 3. lane) and a strong band at a higher position for PKC $\beta$ b  
219 (white arrowhead in Fig 3a, 4. lane). The PKC $\alpha$  MC5 antibody recognizes the zebrafish PKC $\alpha$ b  
220 at exactly 75 kDa (Fig 3b, 2. lane), and in addition PKC $\alpha$ a and PKC $\beta$ b at a slightly higher  
221 position (Fig 4b, 1. and 4. lane). The PKC $\beta$ 1 antibody strongly recognizes recombinant  
222 zebrafish PKC $\alpha$ a (Fig 3c, 1. lane) and weakly PKC $\beta$ b (Fig 3c, 4. Lane), but none of the other  
223 recombinant PKCs (Fig 3c, 2., 3., 5. and 6. lane). These western blot results confirm that these  
224 antibodies recognize various antigens, explaining their differential immunohistological  
225 labeling of differing bipolar cell populations.

226

## 227 **Discussion**

228 After analyzing the expression and phylogenetic relations of zebrafish *prkc* genes (Haug,  
229 Gesemann, Berger, & Neuhaus, 2018) we focused on the retina, as PKC $\alpha$  and  $-\beta$  antibodies  
230 are widely used in the community as markers for ON-bipolar cells. To identify which zebrafish  
231 PKC(s) are labeled by the commercially available antibodies we performed fluorescent ISH in  
232 combination with PKC $\alpha$  antibody labeling and Western blots using recombinant PKCs.

233

### 234 **Commercially available PKC antibodies recognize different zebrafish PKC variants**

235 Although non-mammalian vertebrates possess a significantly higher diversity of bipolar cells  
236 than mammals, their main functions are conserved [37]. PKC $\alpha$  and sometimes PKC $\beta$   
237 antibodies are commonly used as ON-bipolar cell markers. However, the frequently used  
238 antibodies against PKC $\alpha$  and/or  $-\beta$  have been designed to recognize human or bovine epitopes.  
239 Hence, it is not known which PKC proteins are recognized in other species. Moreover, the  
240 whole genome duplication event in the lineage of teleost fish has added to the complexity [34],  
241 increasing the number of *prkcs* to five. This increase in retinal genes may be the basis for the  
242 33 different types of bipolar cells that were recently identified in zebrafish [20]. Another  
243 explanation could be that some aspects of visual processing that takes place in higher brain  
244 areas of mammals is achieved in the retina of lower vertebrates.

245 Our initial ISH showed labeling of both *prkca* and *prkcb* paralogs in the INL of the retina where  
246 bipolar cells are located. We found a complete overlap in cells of the middle INL when  
247 applying the riboprobe of *prkcaa* and the antibody against PKC $\alpha$  MC5 (Fig 2b1-4). Some but  
248 not all PKC $\alpha$ -positive cell bodies did also express *prkcab* and *prkcbb* (Fig 2d1-4, h1-4),  
249 indicating that at least some PKC $\alpha$ -positive cells express different *prkc* paralogs, while others  
250 only seem to exclusively express *prkcaa*. Interestingly, while the PKC $\alpha$  MC5 antibody indeed  
251 recognizes the zebrafish PKC $\alpha$ , it also recognizes other zebrafish PKCs (Fig 3). Moreover,

252 western blot results indicated that all tested PKC antibodies recognize a combination of PKCs,  
253 demonstrating that the tested antibodies are not specific for one single zebrafish PKC but rather  
254 label a mixture of different PKC subtypes. When tested on other tissues such as the brain and  
255 the jaw of 5 day old larvae, the PKC $\alpha$  MC5 and the PKC $\beta$  antibodies were expressed in clearly  
256 different areas, indicating that these two antibodies indeed do not recognize the same  
257 combination of zebrafish PKCs as also shown by Western blots (Fig 3).

258

### 259 **PKC $\alpha$ and PKC $\beta$ antibodies as marker for ON-bipolar cells**

260 It is generally assumed that PKC $\alpha$  [10] or PKC $\alpha/\beta$  antibodies [12] label B<sub>ON</sub> s6L cells, a bipolar  
261 cell type morphologically resembling the mixed-input (b1 or Mb) ON-bipolar cells of other  
262 teleosts [19]. Recent data suggest that the B<sub>ON</sub> s6L bipolar cell is identical to the RRod cell, an  
263 ON-bipolar cell that only contacts rods [20]. However, earlier studies describe labelling of an  
264 additional bipolar cell type by PKC $\alpha$  or PKC $\alpha/\beta$  antibodies [38,12], which possibly  
265 corresponds to the slightly smaller B<sub>ON</sub> s6 type that contacts cones [19].

266 All tested antibodies labeled the same cells of the INL in adult zebrafish retina and they seem  
267 to be of at least two kinds: we find labeled cells that contain large axon terminals in a more  
268 proximal part of the IPL as well as other cells with smaller axon terminals that ramify in a more  
269 distal part of the IPL. Based on morphology, these two subtypes likely comprise the above  
270 mentioned B<sub>ON</sub> s6L or RRod type and the B<sub>ON</sub> s6 type [19,20]. As *prkcaa* expression and the  
271 antibody labeling are identical, this indicates that *prkcaa* is expressed in these two different  
272 bipolar cell subtypes as well.

273 The second *prkca* paralog, *prkcab*, is also expressed in the middle INL, however its expression  
274 only partially overlaps with PKC $\alpha$ -positive cells. This different expression suggests a gain of  
275 function after the teleost-specific whole genome duplication [39,34]. Interestingly, *prkcb* is  
276 also located in the middle INL and overlaps with some PKC $\alpha$ -positive cells, however, it might  
277 also label additional subtypes.

278 Intriguingly, in larval tissue both *prkca* paralogs label cells in the middle INL [35] but  
279 expression in other retinal cells is only visible in adult sections (Fig 1). In addition, both *prkcb*  
280 paralogs are only expressed in the adult retina (Fig 1) [35]. For most species it is hypothesized  
281 that PKC $\alpha$  and/or - $\beta$  labels additionally rod ON-bipolar cells [40,4,1,7] and our study also  
282 indicates the labeling of RRod cells. As the rod circuitry is established only at later stages and  
283 has been shown to be functional earliest in 15 day old larvae [41] expression of molecules  
284 involved in rod ON-bipolar cell signaling are expected to appear only in older larvae. Taken  
285 together our results suggest that PKC variants are also expressed in RRod cells and that the  
286 commercial antibodies recognize at least a subset of these cells.

287

#### 288 ***prkc* expression in other retina cells**

289 Besides the expected expression in bipolar cells, both *prkca* and -*b* paralogs were also found  
290 in additional retinal cell types. So far, studies describe the expression of conventional PKCs in  
291 photoreceptors [42–47], and in rod outer segments [48,49]. However, other studies were unable  
292 to detect PKC-positive photoreceptors (e.g. [4,50,1] or show ambiguous results depending on  
293 the applied technique [51,52] or the species examined [10,7]. While we did not detect any *prkc*  
294 transcripts in photoreceptors by conventional ISH, fluorescent ISH of *prkcbb* showed a weak  
295 expression in the ONL suggesting that low concentration of transcripts are indeed present. This  
296 is in line with reports about the crucial role of PKCs in photoreceptor development [53] as well  
297 as phosphorylation of a number of molecules important for phototransduction (e.g. rhodopsin)  
298 [54,49,55]. Interestingly, the PKC $\alpha$  NBP antibody (Fig 1C',C'') shows a similar expression in  
299 the photoreceptor layer as was previously published by Osborne and colleagues for a PKC $\alpha$   
300 labeling in the rabbit retina (Osborne, Barnett, Morris, & Huang, 1992). As the company states  
301 on the product datasheet that this antibody recognizes the PKC $\alpha$ , - $\beta$ , and - $\delta$  isoform, the  
302 labeling in photoreceptors might be due to any of these PKCs.

303 *Prkcab*, *-ba* and *-bb* all show an additional expression in the INL besides the expected  
304 expression in bipolar cells. Due to the location in the distal or proximal INL, respectively, we  
305 expect *prkcab* to be expressed in horizontal cells and *prkcba* in amacrine cells while *prkcbb* is  
306 distributed throughout the INL and might be expressed in both retinal cell types. Earlier  
307 investigations have shown an involvement of PKCs in activity dependent morphological  
308 changes of horizontal cell synapses [56,57], however, this was disputed later [58]. Vertebrate  
309 amacrine cells, however, do definitely also express conventional PKCs. This was shown by  
310 subtype-specific labeling of PKC $\alpha$  in rat and rabbit [51,47], and PKC $\beta$  in rat and human [50,51].  
311 As we only found evidence for *prkcba* and maybe *prkcbb* expression in the proximal INL where  
312 amacrine cells are located, one of the PKC $\beta$ -paralogs might have covered the function of the PKC $\alpha$   
313 in these cells in zebrafish.

314 Interestingly, at least in the rodent retina PKC $\gamma$  has also a function, as the lack of PKC $\gamma$  (but  
315 also of PKC $\beta$ ) totally inhibits rod development in mice [53]. Previous studies are conflicting  
316 with some reporting expression of PKC $\gamma$  in the retina [50,45], while others failed to detect any  
317 labeling [43,51,47,59]. In our study the absence of retinal expression of *prkcg* cannot be  
318 attributed to technical issues, since the *prkcg* probe shows distinct cerebellar expression [35].

319

320 We find a weak *prkcab* and *-bb* expression as well as a very pronounced expression of *prkcba*  
321 in the retinal ganglion cell layer of adult zebrafish, however, in an earlier study we did not  
322 detect any *prkc* expression in the GCL in larval tissue [35]. This is in accordance with previous  
323 studies, where PKC $\beta$  has been located in the GCL [43,50,51,45,47] but only few studies  
324 describe the expression of PKC $\alpha$  in this retinal layer [60,59]. In line with the transcript  
325 expression, we find the PKC $\alpha$  MC5 antibody of both companies to label cells in the GCL  
326 (asterisk in Fig 1A'',B'', 3J), indicating that these antibodies recognize at least one of the  $\beta$ -  
327 paralogs as well.

328

## 329 **Conclusion**

330 Commercial PKC $\alpha$  and  $-\beta$  antibodies are commonly used to label ON-bipolar cells in the  
331 vertebrate retina. We found that these antibodies indeed consistently label a subset of ON-  
332 bipolar cells of both the scotopic and photopic pathway ( $B_{ON\ s6L}$  or RRod type and  $B_{ON\ s6}$ ) in  
333 the zebrafish retina. However, these antibodies are not as often considered pan-ON-bipolar cell  
334 markers but rather mark different bipolar cell subtype populations.

335

## 336 **Acknowledgements**

337 We would like to acknowledge Kara Kristiansen and Martin Walther for technical support and  
338 excellent fish care.

339

340

## 341 **References**

- 342 1. Negishi K, Kato S, Teranishi T (1988) Dopamine cells and rod bipolar cells contain  
343 protein kinase C-like immunoreactivity in some vertebrate retinas. *Neuroscience letters*  
344 94 (3): 247–252.
- 345 2. Breuiller-Fouché M, Tertrin-Clary C, Hélué V, Fournier T, Ferré F (1998) Role of  
346 protein kinase C in endothelin-1-induced contraction of human myometrium. *Biology of*  
347 *reproduction* 59 (1): 153–159.
- 348 3. Caminos E, Velasco A, Jarrín M, Aijón J, Lara JM (1999) Protein kinase C-like  
349 immunoreactive cells in embryo and adult chicken retinas. *Brain research*.  
350 *Developmental brain research* 118 (1-2): 227–230.

- 351 4. Greferath U, Grünert U, Wässle H (1990) Rod bipolar cells in the mammalian retina  
352 show protein kinase C-like immunoreactivity. *The Journal of comparative neurology* 301  
353 (3): 433–442.
- 354 5. Grünert U, Martin PR, Wässle H (1994) Immunocytochemical analysis of bipolar cells  
355 in the macaque monkey retina. *The Journal of comparative neurology* 348 (4): 607–627.
- 356 6. Haverkamp S, Wässle H (2000) Immunocytochemical analysis of the mouse retina. *The*  
357 *Journal of comparative neurology* 424 (1): 1–23.
- 358 7. Osborne NN, Broyden NJ, Barnett NL, Morris NJ (1991) Protein kinase C (alpha and  
359 beta) immunoreactivity in rabbit and rat retina: effect of phorbol esters and transmitter  
360 agonists on immunoreactivity and the translocation of the enzyme from cytosolic to  
361 membrane compartments. *Journal of neurochemistry* 57 (2): 594–604.
- 362 8. Vaquero CF, Velasco A, de la Villa, P (1996) Protein kinase C localization in the  
363 synaptic terminal of rod bipolar cells. *Neuroreport* 7 (13): 2176–2180.
- 364 9. Zhang DR, Yeh HH (1991) Protein kinase C-like immunoreactivity in rod bipolar cells  
365 of the rat retina: a developmental study. *Visual neuroscience* 6 (5): 429–437.
- 366 10. Caminos E, Velasco A, Jarrín M, Lillo C, Jimeno D et al. (2000) A comparative study of  
367 protein kinase C-like immunoreactive cells in the retina. *Brain, behavior and evolution*  
368 56 (6): 330–339.
- 369 11. Connaughton VP (2011) Bipolar cells in the zebrafish retina. *Visual neuroscience* 28 (1):  
370 77–93.
- 371 12. Yazulla S, Studholme KM (2001) Neurochemical anatomy of the zebrafish retina as  
372 determined by immunocytochemistry. *Journal of neurocytology* 30 (7): 551–592.
- 373 13. Boycott BB, Wässle H (1991) Morphological Classification of Bipolar Cells of the  
374 Primate Retina. *The European journal of neuroscience* 3 (11): 1069–1088.
- 375 14. Famiglietti EV (1981) Functional architecture of cone bipolar cells in mammalian retina.  
376 *Vision research* 21 (11): 1559–1563.



- 377 15. Ghosh KK, Bujan S, Haverkamp S, Feigenspan A, Wässle H (2004) Types of bipolar  
378 cells in the mouse retina. *The Journal of comparative neurology* 469 (1): 70–82.
- 379 16. Kolb H, Linberg KA, Fisher SK (1992) Neurons of the human retina: a Golgi study. *The*  
380 *Journal of comparative neurology* 318 (2): 147–187.
- 381 17. Macosko EZ, Basu A, Satija R, Nemes J, Shekhar K et al. (2015) Highly Parallel  
382 Genome-wide Expression Profiling of Individual Cells Using Nanoliter Droplets. *Cell*  
383 161 (5): 1202–1214.
- 384 18. Wässle H, Puller C, Müller F, Haverkamp S (2009) Cone contacts, mosaics, and  
385 territories of bipolar cells in the mouse retina. *The Journal of neuroscience : the official*  
386 *journal of the Society for Neuroscience* 29 (1): 106–117.
- 387 19. Connaughton VP, Graham D, Nelson R (2004) Identification and morphological  
388 classification of horizontal, bipolar, and amacrine cells within the zebrafish retina. *The*  
389 *Journal of comparative neurology* 477 (4): 371–385.
- 390 20. Li YN, Tsujimura T, Kawamura S, Dowling JE (2012) Bipolar cell-photoreceptor  
391 connectivity in the zebrafish (*Danio rerio*) retina. *The Journal of comparative neurology*  
392 520 (16): 3786–3802.
- 393 21. Sherry DM, Yazulla S (1993) Goldfish bipolar cells and axon terminal patterns. A Golgi  
394 study. *The Journal of comparative neurology* 329 (2): 188–200.
- 395 22. Wu SM, Gao F, Maple BR (2000) Functional architecture of synapses in the inner retina:  
396 segregation of visual signals by stratification of bipolar cell axon terminals. *The Journal*  
397 *of neuroscience : the official journal of the Society for Neuroscience* 20 (12): 4462–  
398 4470.
- 399 23. Wu SM (2010) Synaptic organization of the vertebrate retina: general principles and  
400 species-specific variations: the Friedenwald lecture. *Investigative ophthalmology &*  
401 *visual science* 51 (3): 1263–1274.

- 402 24. Euler T, Schneider H, Wässle H (1996) Glutamate responses of bipolar cells in a slice  
403 preparation of the rat retina. *The Journal of neuroscience : the official journal of the*  
404 *Society for Neuroscience* 16 (9): 2934–2944.
- 405 25. Nelson R, Kolb H (1983) Synaptic patterns and response properties of bipolar and  
406 ganglion cells in the cat retina. *Vision research* 23 (10): 1183–1195.
- 407 26. Saito T, Kujiraoka T, Yonaha T, Chino Y (1985) Reexamination of photoreceptor-  
408 bipolar connectivity patterns in carp retina: HRP-EM and Golgi-EM studies. *The Journal*  
409 *of comparative neurology* 236 (2): 141–160.
- 410 27. Pang J-J, Gao F, Wu SM (2004) Stratum-by-stratum projection of light response  
411 attributes by retinal bipolar cells of *Ambystoma*. *The Journal of physiology* 558 (Pt 1):  
412 249–262.
- 413 28. Wong KY, Cohen ED, Dowling JE (2005) Retinal bipolar cell input mechanisms in giant  
414 danio. II. Patch-clamp analysis of on bipolar cells. *Journal of neurophysiology* 93 (1):  
415 94–107.
- 416 29. Wong KY, Dowling JE (2005) Retinal bipolar cell input mechanisms in giant danio. III.  
417 ON-OFF bipolar cells and their color-opponent mechanisms. *Journal of neurophysiology*  
418 94 (1): 265–272.
- 419 30. Newton AC (2010) Protein kinase C: poised to signal. *American journal of physiology.*  
420 *Endocrinology and metabolism* 298 (3): 402.
- 421 31. Steinberg SF (2008) Structural basis of protein kinase C isoform function. *Physiological*  
422 *reviews* 88 (4): 1341–1378.
- 423 32. Sakai N, Saito N, Seki T (2011) Molecular pathophysiology of neurodegenerative  
424 disease caused by  $\gamma$ PKC mutations. *The world journal of biological psychiatry : the*  
425 *official journal of the World Federation of Societies of Biological Psychiatry* 12 Suppl 1:  
426 95–98.

- 427 33. Tarr JM, Kaul K, Chopra M, Kohner EM, Chibber R (2013) Pathophysiology of diabetic  
428 retinopathy. *ISRN ophthalmology* 2013: 343560.
- 429 34. Glasauer, Stella M K, Neuhauss, Stephan C F (2014) Whole-genome duplication in  
430 teleost fishes and its evolutionary consequences. *Molecular genetics and genomics* :  
431 *MGG* 289 (6): 1045–1060.
- 432 35. Haug MF, Gesemann M, Berger M, Neuhauss SCF (2018) Phylogeny and distribution of  
433 protein kinase C variants in the zebrafish. *The Journal of comparative neurology* 526 (7):  
434 1097–1109.
- 435 36. Vitorino M, Jusuf PR, Maurus D, Kimura Y, Higashijima S-i et al. (2009) *Vsx2* in the  
436 zebrafish retina: restricted lineages through derepression. *Neural development* 4: 14.
- 437 37. Euler T, Haverkamp S, Schubert T, Baden T (2014) Retinal bipolar cells: elementary  
438 building blocks of vision. *Nature reviews. Neuroscience* 15 (8): 507–519.
- 439 38. Suzuki S, Kaneko A (1990) Identification of bipolar cell subtypes by protein kinase C-  
440 like immunoreactivity in the goldfish retina. *Visual neuroscience* 5 (3): 223–230.
- 441 39. Force A, Lynch M, Pickett FB, Amores A, Yan YL et al. (1999) Preservation of  
442 duplicate genes by complementary, degenerative mutations. *Genetics* 151 (4): 1531–  
443 1545.
- 444 40. Euler T, Wässle H (1995) Immunocytochemical identification of cone bipolar cells in  
445 the rat retina. *The Journal of comparative neurology* 361 (3): 461–478.
- 446 41. Bilotta J, Saszik S, Sutherland SE (2001) Rod contributions to the electroretinogram of  
447 the dark-adapted developing zebrafish. *Developmental dynamics : an official publication*  
448 *of the American Association of Anatomists* 222 (4): 564–570.
- 449 42. Cuenca N, Fernández E, Kolb H (1990) Distribution of immunoreactivity to protein  
450 kinase C in the turtle retina. *Brain research* 532 (1-2): 278–287.

- 451 43. Fukuda K, Saito N, Yamamoto M, Tanaka C (1994) Immunocytochemical localization  
452 of the alpha-, beta I-, beta II- and gamma-subspecies of protein kinase C in the monkey  
453 visual pathway. *Brain research* 658 (1-2): 155–162.
- 454 44. Ohki K, Yoshida K, Imaki J, Harada T, Matsuda H (1994) The existence of protein  
455 kinase C in cone photoreceptors in the rat retina. *Current eye research* 13 (7): 547–550.
- 456 45. Osborne NN, Barnett NL, Morris NJ, Huang FL (1992) The occurrence of three  
457 isoenzymes of protein kinase C (alpha, beta and gamma) in retinas of different species.  
458 *Brain research* 570 (1-2): 161–166.
- 459 46. Udovichenko IP, Cunnick J, Gonzalez K, Yakhnin A, Takemoto DJ (1996) Protein  
460 kinase C in rod outer segments: effects of phosphorylation of the phosphodiesterase  
461 inhibitory subunit. *The Biochemical journal* 317 ( Pt 1): 291–295.
- 462 47. Usuda N, Kong Y, Hagiwara M, Uchida C, Terasawa M et al. (1991) Differential  
463 localization of protein kinase C isozymes in retinal neurons. *The Journal of cell biology*  
464 112 (6): 1241–1247.
- 465 48. Kapoor CL, Chader GJ (1984) Endogenous phosphorylation of retinal photoreceptor  
466 outer segment proteins by calcium phospholipid-dependent protein kinase. *Biochemical*  
467 *and biophysical research communications* 122 (3): 1397–1403.
- 468 49. Udovichenko IP, Newton AC, Williams DS (1997) Contribution of protein kinase C to  
469 the phosphorylation of rhodopsin in intact retinas. *The Journal of biological chemistry*  
470 272 (12): 7952–7959.
- 471 50. Kolb H, Zhang L, Dekorver L (1993) Differential staining of neurons in the human  
472 retina with antibodies to protein kinase C isozymes. *Visual neuroscience* 10 (2): 341–  
473 351.
- 474 51. Kosaka J, Suzuki A, Morii E, Nomura S (1998) Differential localization and expression  
475 of alpha and beta isoenzymes of protein kinase C in the rat retina. *Journal of*  
476 *neuroscience research* 54 (5): 655–663.

- 477 52. Williams DS, Liu X, Schlamp CL, Ondek B, Jaken S et al. (1997) Characterization of  
478 protein kinase C in photoreceptor outer segments. *Journal of neurochemistry* 69 (4):  
479 1693–1702.
- 480 53. Pinzon-Guzman C, Zhang SS-M, Barnstable CJ (2011) Specific protein kinase C  
481 isoforms are required for rod photoreceptor differentiation. *The Journal of neuroscience* :  
482 the official journal of the Society for Neuroscience 31 (50): 18606–18617.
- 483 54. Greene NM, Williams DS, Newton AC (1997) Identification of protein kinase C  
484 phosphorylation sites on bovine rhodopsin. *The Journal of biological chemistry* 272 (16):  
485 10341–10344.
- 486 55. Wood JP, McCord RJ, Osborne NN (1997) Retinal protein kinase C. *Neurochemistry*  
487 *international* 30 (2): 119–136.
- 488 56. Rodrigues PdS, Dowling JE (1990) Dopamine induces neurite retraction in retinal  
489 horizontal cells via diacylglycerol and protein kinase C. *Proceedings of the National*  
490 *Academy of Sciences of the United States of America* 87 (24): 9693–9697.
- 491 57. Weiler R, Kohler K, Janssen U (1991) Protein kinase C mediates transient spinule-type  
492 neurite outgrowth in the retina during light adaptation. *Proceedings of the National*  
493 *Academy of Sciences of the United States of America* 88 (9): 3603–3607.
- 494 58. Schmidt KF (1996) Protein kinase C does not mediate the dopamine-dependent  
495 modulation of glutamate receptors in retinal horizontal cells of the perch (*Perca*  
496 *fluviatilis*). *Vision research* 36 (24): 3939–3942.
- 497 59. Wang L, Lam JS-Y, Zhao H, Wang J, Chan S-O (2014) Localization of protein kinase C  
498 isoforms in the optic pathway of mouse embryos and their role in axon routing at the  
499 optic chiasm. *Brain research* 1575: 22–32.
- 500 60. Kolb H, Zhang L (1997) Immunostaining with antibodies against protein kinase C  
501 isoforms in the fovea of the monkey retina. *Microscopy research and technique* 36 (1):  
502 57–75.

## 503 **Figures Legends**

### 504 **Figure 1: Commercially available PKC antibodies label overlapping but also distinct** 505 **central nervous system structures**

506 Double labeling of PKC $\alpha$  (MC5 Novus, MC5 Genetex, and NBP Novus) and PKC $\beta$  (Santa  
507 Cruz Biotechnology) antibodies on retinal sections of adult (a-c) and 5 dpf larval (d,e) zebrafish.  
508 Both PKC $\alpha$  MC5 antibodies show an overlapping labeling in retinal bipolar cells with the  
509 PKC $\beta$  antibody (a'' and b''). Different shapes of axon terminals in the IPL (arrows and  
510 arrowheads in a'' and b'') suggest labeling of at least two different bipolar cells types. In  
511 addition, both PKC $\alpha$  MC5 antibodies weakly label some cells in the GCL (asterisk in a'' and  
512 b''). The epitope of a third PKC $\alpha$  antibody (NBP, Novus) is located in an overlapping manner  
513 in the INL and IPL but is also found accessory outer segments of photoreceptors in the ONL  
514 (c-c''). Double labeling on transverse sections of 5 dpf larvae shows that the PKC $\alpha$  (MC5,  
515 Genetex) and  $\beta$  antibodies additionally label different areas of the brain and the jaw (d,e). For  
516 abbreviations, see list. Scale bar in a'' (applies to a''-'' and b''-''), in c'' (applies to c''-'' and in  
517 e (applies to d and e) = 10  $\mu$ m.

518

519 **Figure 2: Co-expression analysis of *prkca* and *-b* transcripts with PKC $\alpha$  antibody labeling**  
520 **in adult retinal sections**

521 Conventional (blue) and fluorescent (green) mRNA labeling of *prkca* and *-b* paralogs (a,c,e,g  
522 and b1,d1,f1,h1). Both *prkca* paralogs are expressed in the inner nuclear layer (INL) of the  
523 retina. While the expression of *prkcaa* is restricted to the middle INL (a, b1), *prkcab* transcripts  
524 show a broader expression in the middle and the distal INL, and in the ganglion cell layer  
525 (GCL; c, d1). *prkcba* is expressed in the proximal INL and strongly in the GCL (e, f1), and its  
526 paralog, *prkcbb*, weakly throughout the INL and GCL (g, h1). Additionally photoreceptors are  
527 weakly labeled by the fluorescent method (asterisk in h1).

528 Confocal images of adult retinal sections showing fluorescent *in situ* hybridization (green) in  
529 combination with PKC $\alpha$  MC5 (Novus) antibody labeling (magenta) and the corresponding  
530 overlay (b3,d3,f3,h3). PKC $\alpha$  labeling is found in two different types of bipolar cells, as  
531 illustrated with arrows vs. arrowheads. We find expression of *prkcaa* in all PKC $\alpha$ -positive  
532 bipolar cell bodies in the middle INL (b3-4), while *prkcab* and *-bb* show only partial overlap  
533 (d3-4, h3-4). *prkcba* transcripts seem not to overlay with PKC $\alpha$ -positive cells (f3-4). For  
534 abbreviations, see list. Scale bar in h3 (applies to all images except the close ups) = 25  $\mu$ m.  
535 Scale bar in h4 (applies to b4,d4,f4,h4) = 5  $\mu$ m.

536

537

538 **Figure 3: Western blot analysis of recombinant zebrafish cPKC proteins using PKC $\alpha$  and**  
539 **– $\beta$  antibodies**

540 Three different antibodies were used to compare the specificity of each antibody with  
541 recombinant zebrafish PKCs. The PKC $\alpha$  NBP antibody is specific for PKC $\alpha$ b and both PKC $\beta$   
542 paralogs. Besides, PKC $\alpha$  NBP detects a faint band in all samples, including mock controls,  
543 likely recognizing an endogenous distantly related PKC orthologue present in HEK293T cells  
544 (asterisk at 75 kDa), PKC $\alpha$  MC5 recognizes both zebrafish PKC $\alpha$  paralogs (b, 1. and 2. lane)  
545 as well as PKC $\beta$ b (b, 4. lane). The PKC $\beta$ 1 antibody also recognizes PKC $\alpha$ a (c, 1. lane) but  
546 PKC $\beta$ b only faintly (c, 4. lane), and PKC $\alpha$ b not at all (c, 2. lane). PKC $\gamma$  protein was not  
547 specifically detected with any antibody used (a-c, 5. lane). Anti-Vinculin (124 kDa) antibodies  
548 were used as loading controls. The different antibody recognition patterns are summarized in  
549 d.

550

551



552 **Table 1: Primers used for the cloning of expression constructs**

**Table 1: Primer sites used for the cloning of expression constructs.**

| Gene       | Sequence 5'-3'                                                                                          | Linearization |
|------------|---------------------------------------------------------------------------------------------------------|---------------|
| prkcaa_fwd | AAAAGCTAGCGCCACAATGGCTGATACACAAAG                                                                       | NheI - BglII  |
| prkcaa_rev | TTTTTAGATCTTCCCTTTTTTATTC                                                                               |               |
| prkcab_fwd | AAAAGAATTCGCAACCATGGCTGATCATCTGATACA                                                                    | EcoRI Sall    |
| prkcab_rev | TTTTTGTCGACTCCTGGGACGTCTCATAC                                                                           |               |
| prkcba_fwd | AAAAGAATTCCTATCATGACCGAGTC                                                                              | EcoRI - Sall  |
| prkcba_rev | TTATTGTCGACTTGGCTAAACTGGCTAC                                                                            |               |
| prkcbb_fwd | AAAACCTCGAGCGCAGAATGGCAGAGCCGG                                                                          | XhoI - BamhI  |
| prkcbb_rev | TTTTTGGATCCGGTCGCCCTTAACTCTG                                                                            |               |
| prkcg_fwd  | AAAACCTCGAGTCAACATGGCTGGTCTGGACCCTGG<br>CGTAGGCCATTGAGAAGGTGGACCCCGGCCTCTGTTT<br>TGCAGGAAAGGAGCTCTCAAGC | XhoI - Sall   |
| prkcg_rev  | TATATGTCGACTGAAATTGGTATGTGTGAACTG                                                                       |               |

553

554

555

556 **Table 2: Overview of the antibodies used in this study.**

557

| Antigen            | Description of Immunogen                                                                                                                           | Source, Host species, Cat#, Clone or Lot#, RRID                   | Concentration used                                                    |
|--------------------|----------------------------------------------------------------------------------------------------------------------------------------------------|-------------------------------------------------------------------|-----------------------------------------------------------------------|
| PKC $\alpha$ [MC5] | Purified bovine brain protein kinase C alpha                                                                                                       | Novus, mouse, monoclonal, Cat# NB 200-586, Clone# MC5, AB_2252787 | 1 $\mu$ g / 1ml                                                       |
| PKC $\alpha$ [MC5] | Purified bovine brain protein kinase C alpha                                                                                                       | Genetex, mouse, monoclonal, Cat# GTX20031, Clone# MC5, AB_384212  | 2.7 $\mu$ g / 1ml                                                     |
| PKC $\alpha$       | Synthetic peptide derived from the sequence of human PKC, conjugated to KLH, sequence identical between the alpha, beta and delta isoforms of PKC. | Novus, rabbit, polyclonal, Cat# NBP1-19273, AB_1642848            | 1:500 from original tube, no information about concentration provided |
| cPKC $\beta$ 1 C16 | Synthetic peptide corresponding to amino acids 656-671 at the C-terminus of PKC $\beta$ of human origin (Breuiller-Fouché et al., 1998)            | Santa Cruz, rabbit, polyclonal, sc-209                            | 0.2 $\mu$ g / 1ml                                                     |

558

559

560

561

562

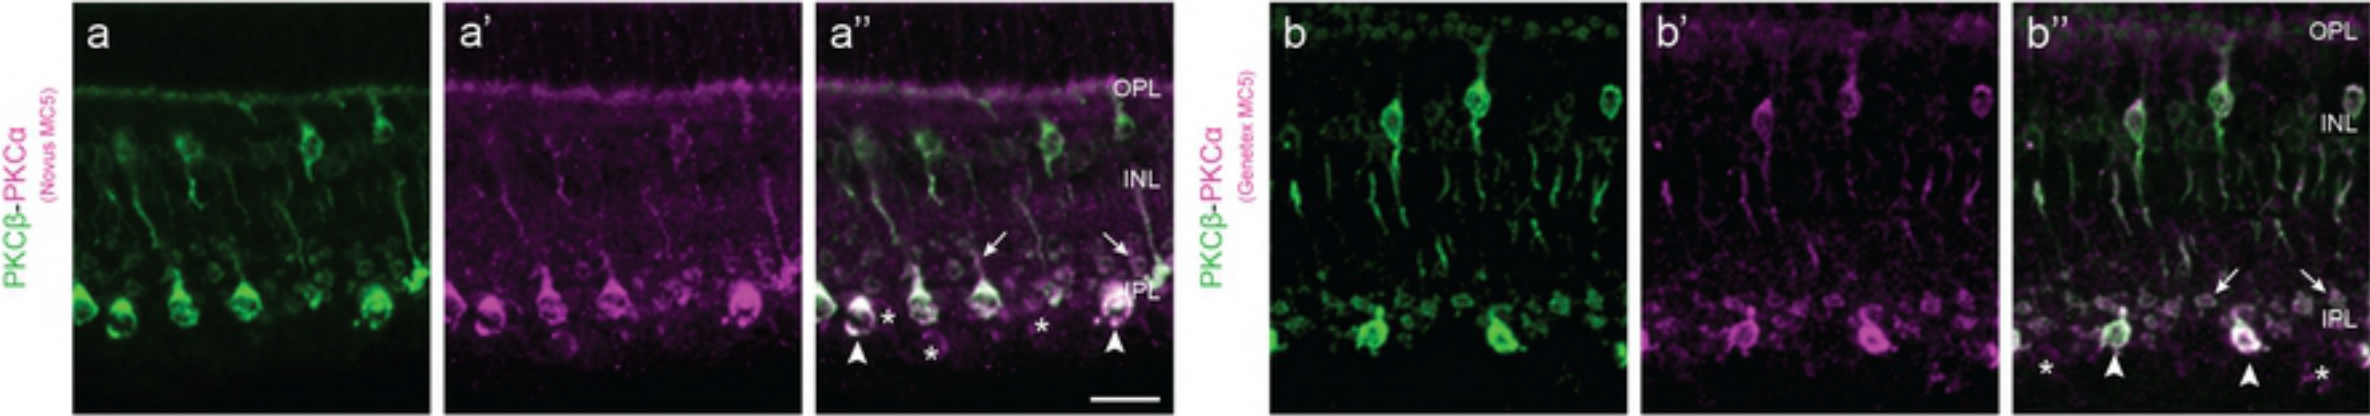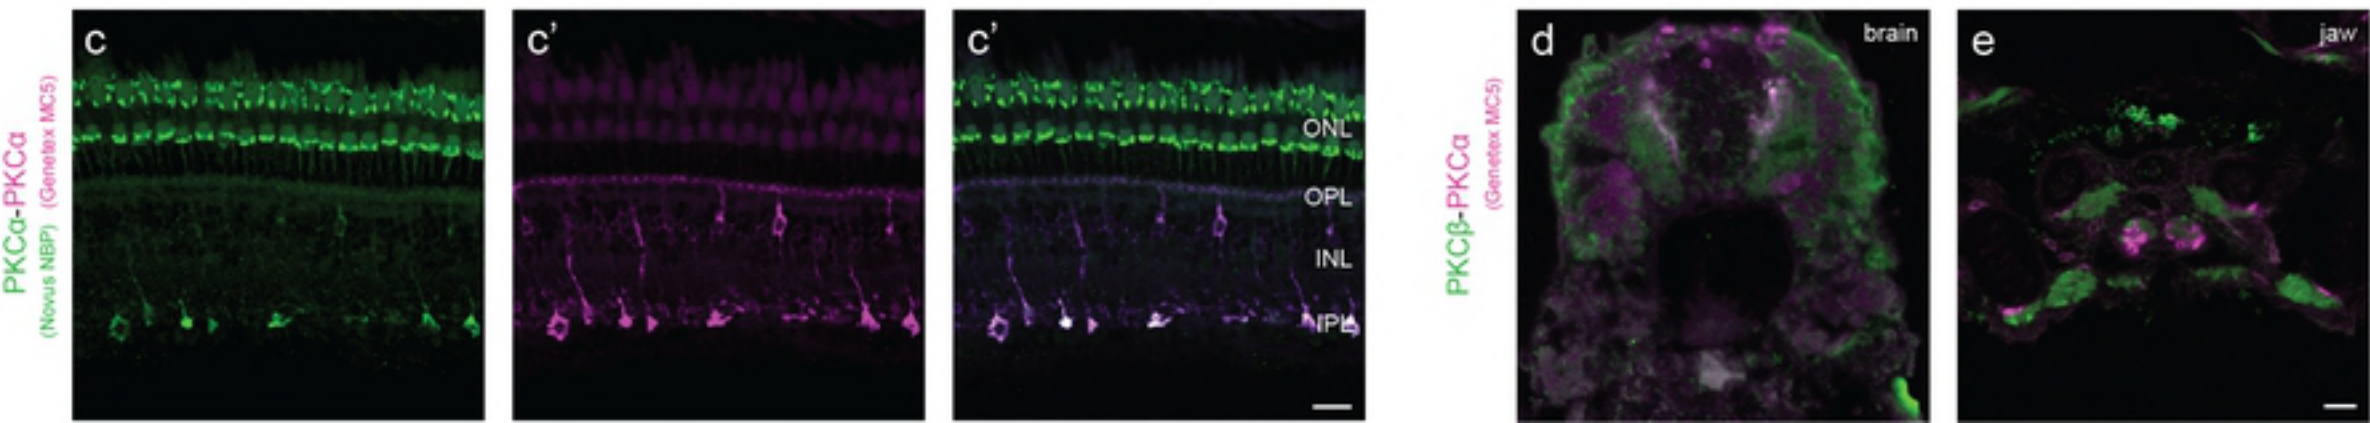

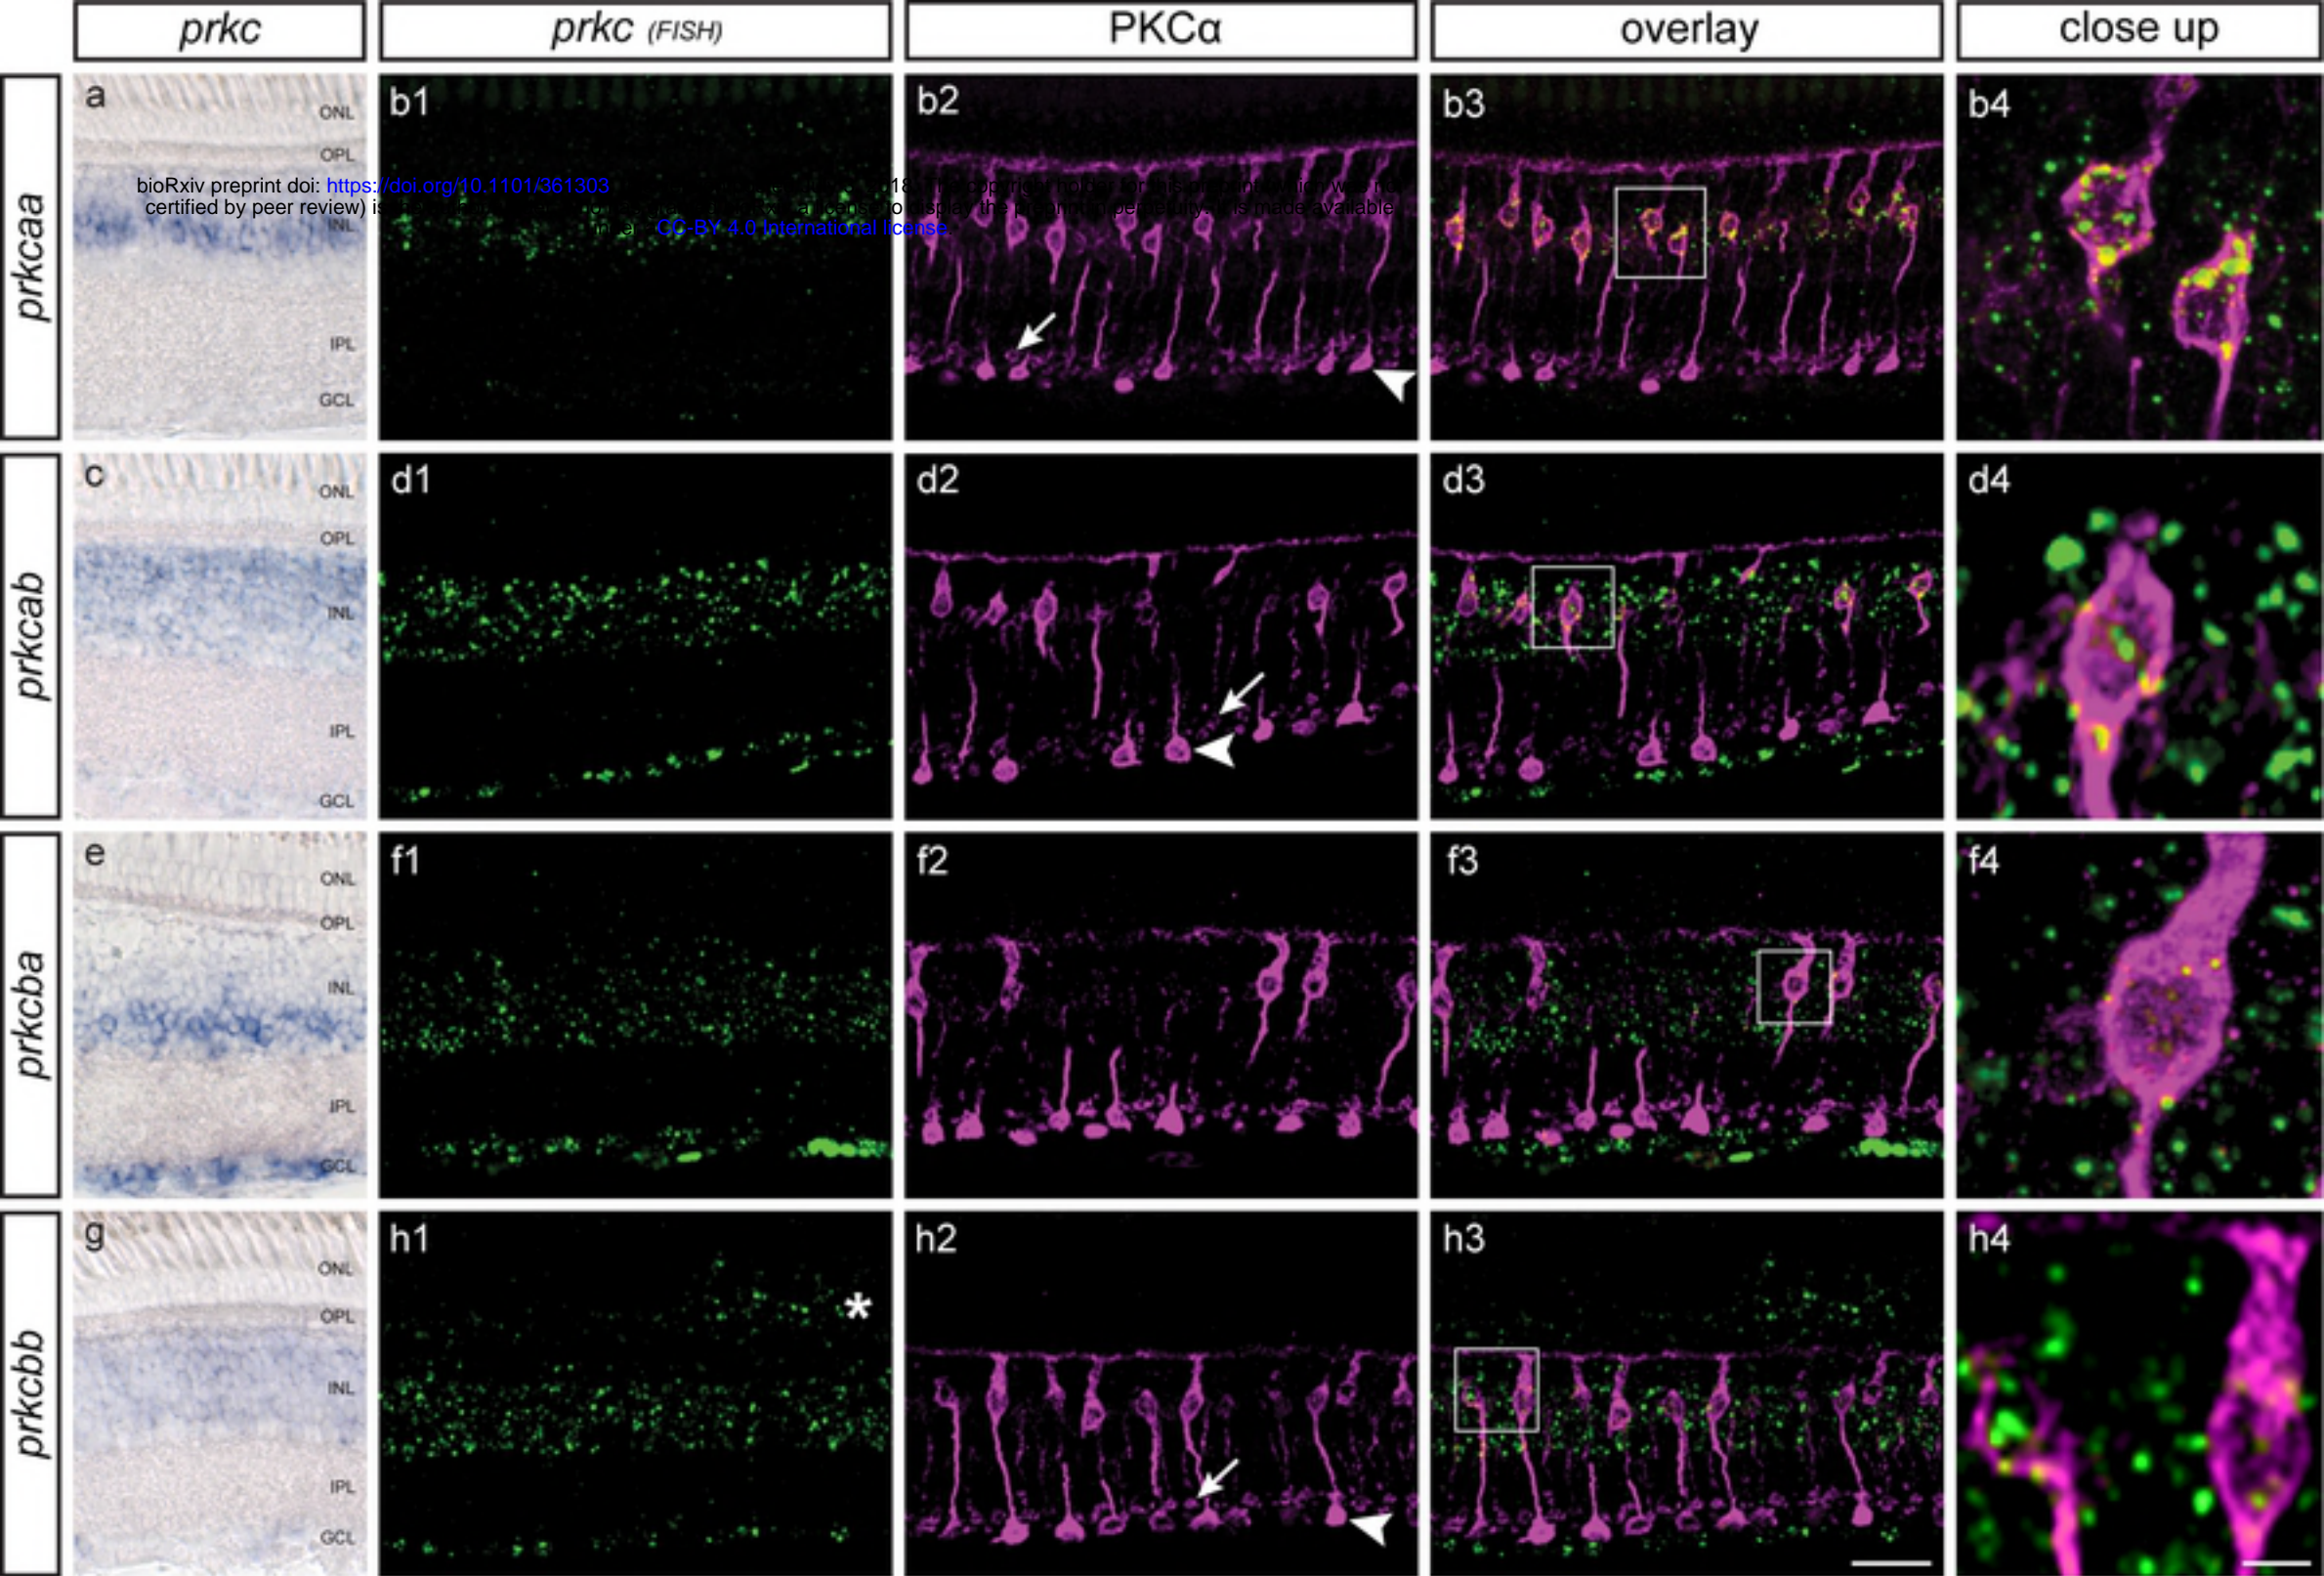

bioRxiv preprint doi: <https://doi.org/10.1101/361303>; this version posted July 18, 2018. The copyright holder for this preprint (which was not certified by peer review) is the author/funder, who has granted bioRxiv a license to display the preprint in perpetuity. It is made available under aCC-BY 4.0 International license.

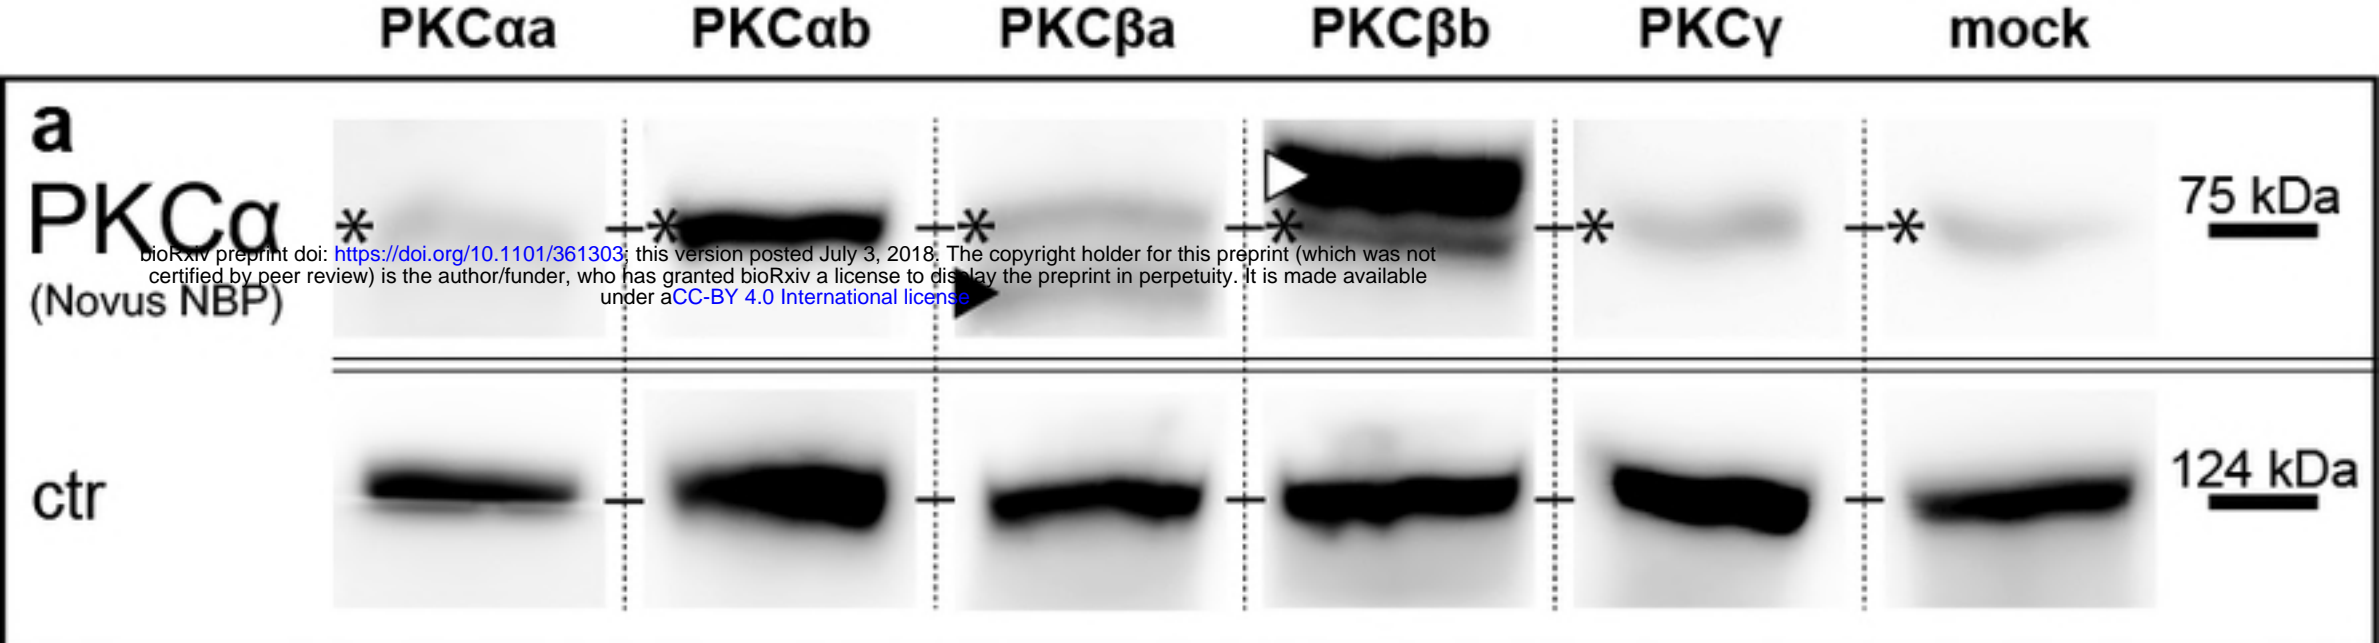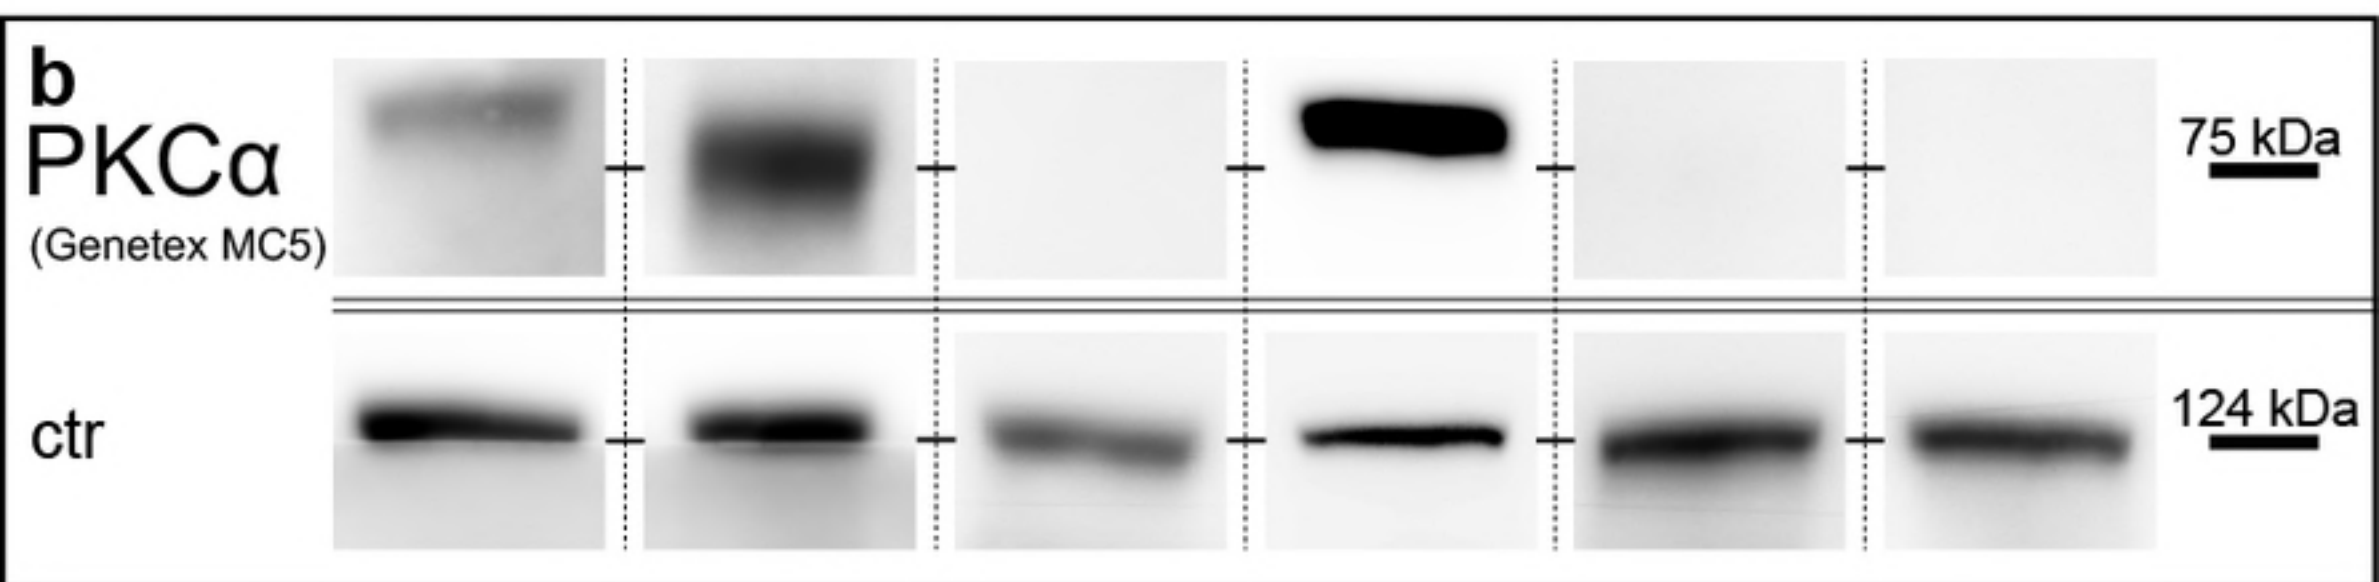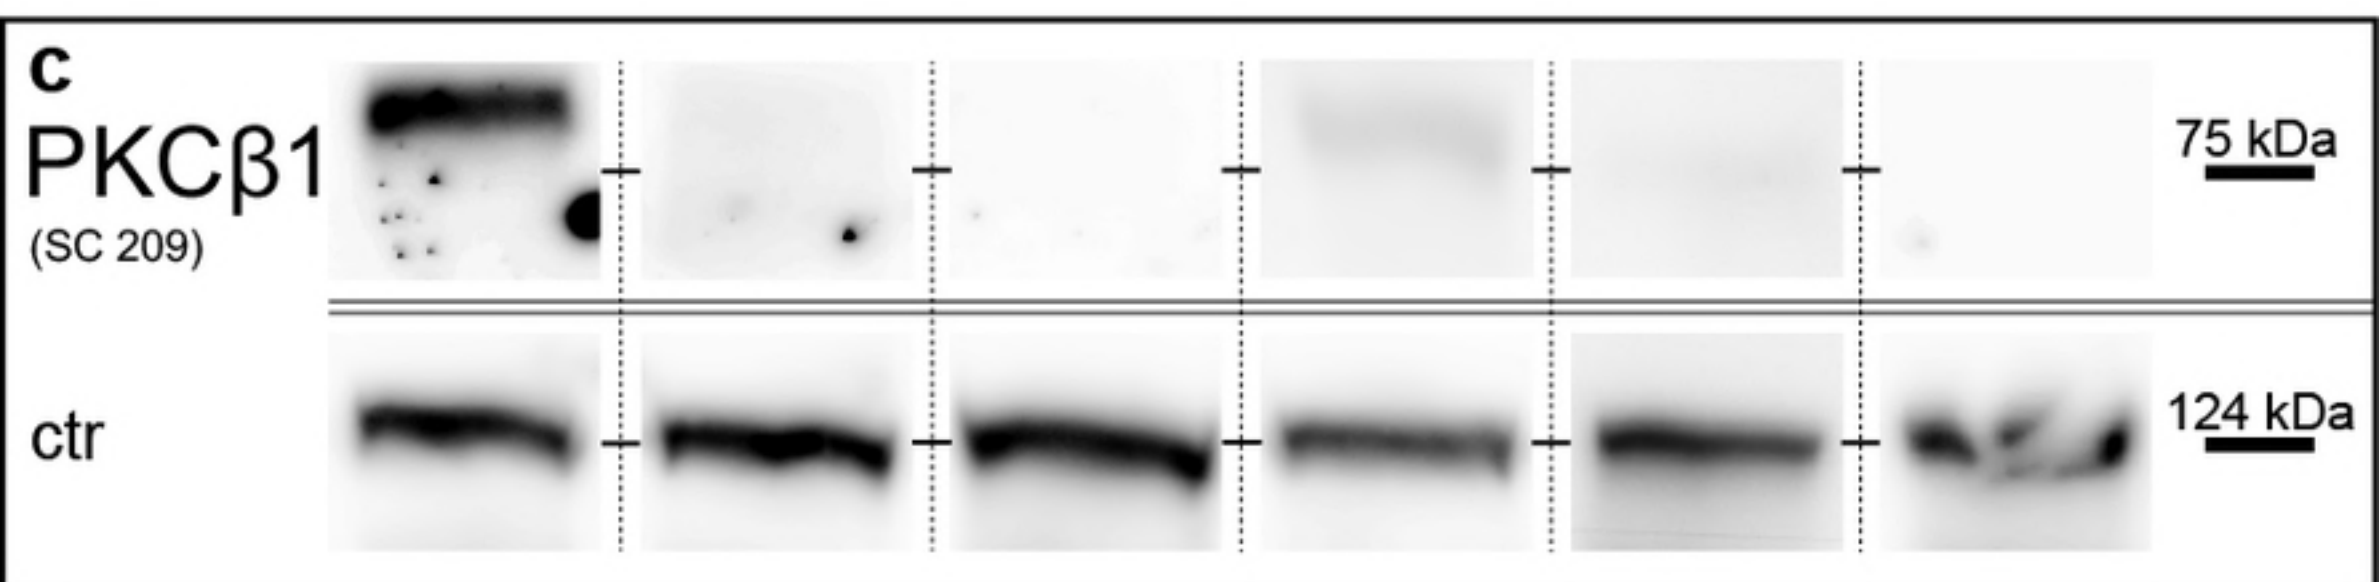

**d**

|                            | PKC $\alpha$ a | PKC $\alpha$ b | PKC $\beta$ a | PKC $\beta$ b | PKC $\gamma$ | mock |
|----------------------------|----------------|----------------|---------------|---------------|--------------|------|
| PKC $\alpha$ (Novus NBP)   | X              | ✓ ++           | ✓ +           | ✓ ++          | X            | X    |
| PKC $\alpha$ (Genetex MC5) | ✓ +            | ✓ ++           | X             | ✓ ++          | X            | X    |
| PKC $\beta$ (SC 209)       | ✓ ++           | X              | X             | ✓ ±           | X            | X    |
